# Supplementary material
Source: PubMed Central journal article supplement (PMC6644510)
Supplement: ao8b01110_si_001.pdf [file ao8b01110_si_001.pdf]

# Correlations between Reduction Degree and Catalytic Properties of WO<sub>x</sub> Nanoparticles

*Febrigia Ghana Rinaldi<sup>1</sup>, Osi Arutanti<sup>2</sup>, Aditya Farhan Arif<sup>1</sup>, Tomoyuki Hirano<sup>1</sup>, Takashi*

*Ogi\*<sup>1</sup>, Kikuo Okuyama<sup>1</sup>*

<sup>1</sup>Department of Chemical Engineering, Graduate School of Engineering, Hiroshima University, 1-4-1 Kagamiyama, Higashi Hiroshima 739-8527, Japan

<sup>2</sup>Research Center for Nanosciences and Nanotechnology (RCNN), Institut Teknologi Bandung, Jl. Ganesha 10, Bandung 40132, Indonesia

\*Corresponding Author: E-mail: [ogit@hiroshima-u.ac.jp](mailto:ogit@hiroshima-u.ac.jp); Tel.: +81-82-424-3675

### S1. Morphology of the WO<sub>x</sub> Nanoparticles Reduced at 400 - 475 °C

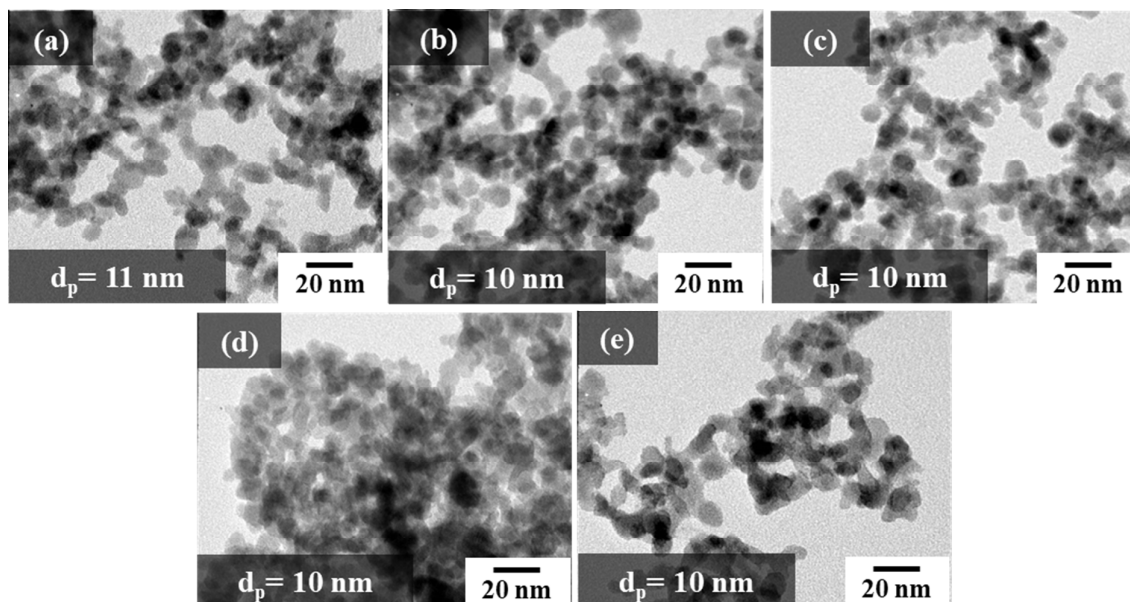

**Figure S1.** TEM images of the as-synthesized WO<sub>x</sub> NPs reduced at (a) 400, (b) 415, (c) 425, (d) 450, (e) 475 °C

### S2. Raman Spectroscopy Analysis

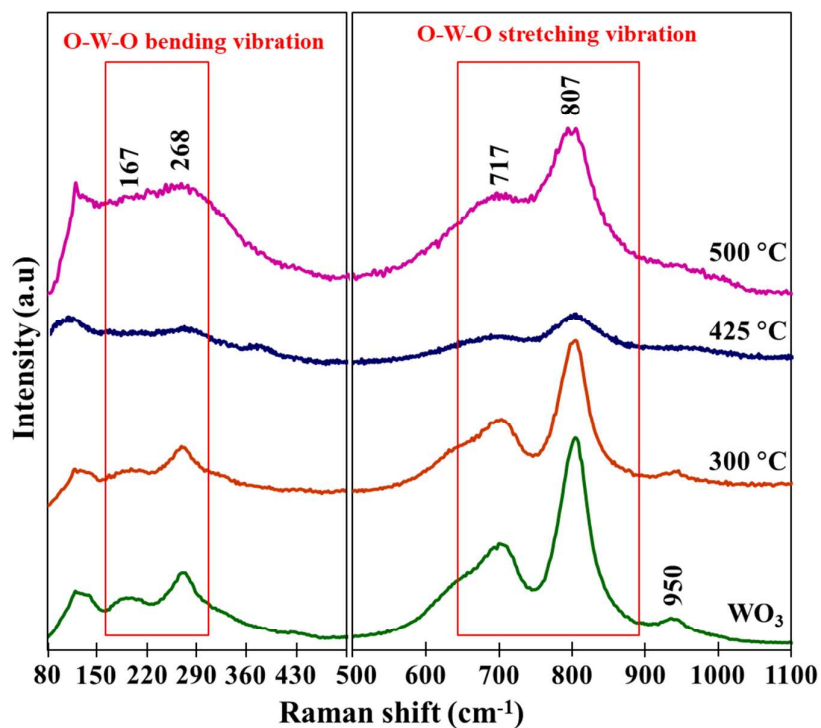

**Figure S2.** Raman spectra of the WO<sub>3</sub> NPs and WO<sub>x</sub> NPs reduced at different temperatures.

The left side shows the short wavelength region from 80 to 500  $\text{cm}^{-1}$  that corresponds to the region for the bending vibration of O-W-O bonding. The right side shows the long wavelength region from 500 to 1100  $\text{cm}^{-1}$  that corresponds to the region for the stretching vibration of O-W-O bonding. In both sections, the Raman spectrum of the  $\text{WO}_3$  NPs shows a sharp line with several strong, well-defined peaks of the monoclinic crystalline phase at 167, 268, 717, and 807  $\text{cm}^{-1}$ . This indicated high crystallinity of the  $\text{WO}_3$  crystal structure.

In the left section, the peak at 268  $\text{cm}^{-1}$  was assigned to the  $\text{W}^{6+}$  state.<sup>1</sup> When the reduction temperature was 300 °C, the Raman spectrum of the obtained  $\text{WO}_x$  NPs showed similar peaks with those in the spectrum of the  $\text{WO}_3$  NPs, but with lower peak intensity, especially for the peak at 167  $\text{cm}^{-1}$ . The weakening of the O-W-O bonding vibration in the spectrum of the  $\text{WO}_x$  (300 °C) NPs indicated the presence of oxygen vacancies, which affected the angle between the W and O atoms.<sup>1</sup> In the spectrum of  $\text{WO}_x$  (425 °C) NPs, the two peaks in the left section were hardly observed. This indicated that the number of oxygen vacancies within the crystal structure was higher than in  $\text{WO}_x$  NPs synthesized at lower temperatures. A similar result was obtained when the reduction temperature was further increased to 500 °C.

In the right section, the W-O stretching vibration was influenced by the change in bond length. **Figure S2** shows that the Raman spectrum of the  $\text{WO}_3$  NPs had the strongest peaks of O-W-O stretching vibrations among the samples. Similar spectra were obtained for  $\text{WO}_x$  NPs reduced at 300 and 500 °C. These results were consistent with the XRD patterns in **Figure S2**, in which  $\text{WO}_x$  (300 °C) NPs and  $\text{WO}_x$  (500 °C) NPs both mainly consisted of the  $\text{WO}_3$  monoclinic structure. The Raman spectrum of the  $\text{WO}_x$  (425 °C) NPs had the weakest peak intensities for the O-W-O stretching vibration. This indicated that the presence of oxygen vacancies resulted in a change in bond length between the W and O atoms. The small peak at

950  $\text{cm}^{-1}$  was assigned to the presence of W=O groups.<sup>1</sup> This small peak weakened and disappeared when the reduction temperature was increased to 425 °C.

### S3. XPS Measurement Results

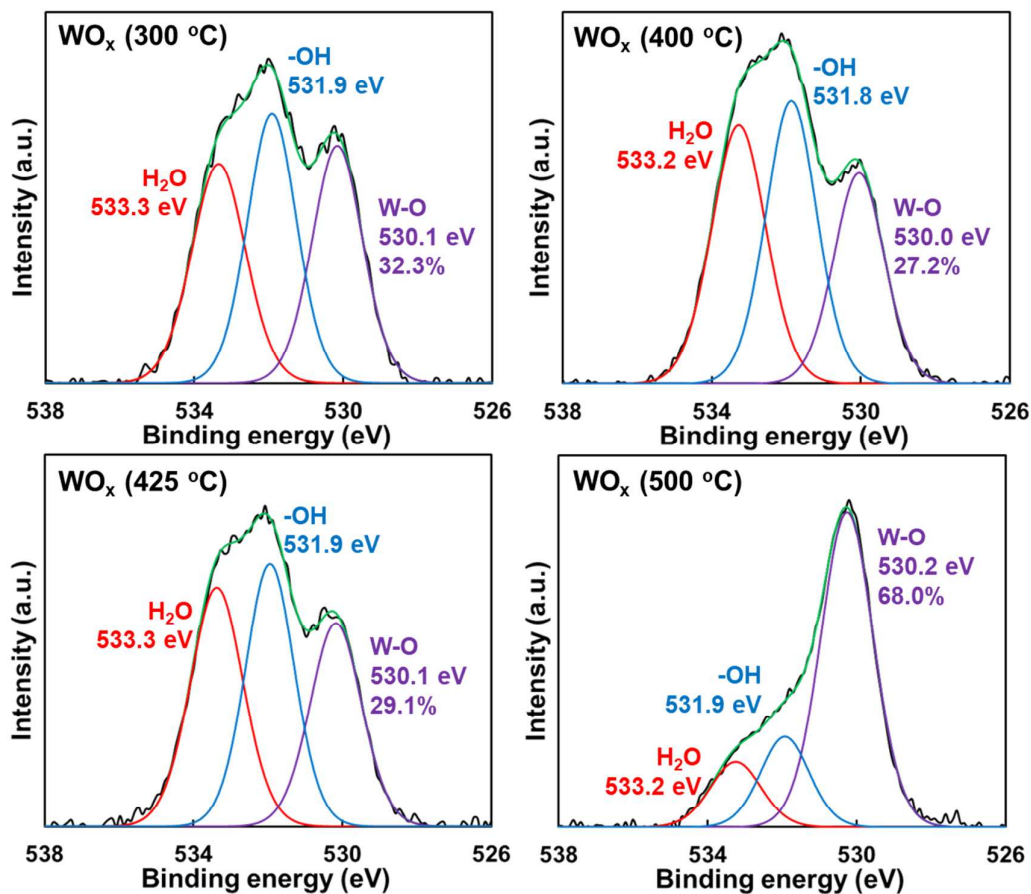

Figure S3. XPS results at binding energies around O 1s orbital for WO<sub>x</sub> nanoparticles

reduced at 300, 400, 425, and 500 °C. All fittings were done with reduced chi-squared values below 50.

Each measurement around the O 1s orbital shows three observable peaks at binding energy of 530, 531.9, and 533.3 eV that correspond to W-O bonding, hydroxyl group (-OH), and water molecule, respectively.<sup>2-3</sup>

### S4. Band Gap Value Analysis

The band gap value for every sample was obtained by using a common method called Tauc plot. <sup>4</sup> This plot is based on an equation derived by Tauc, Davis, and Mott <sup>5</sup> as follows:

$$(h\nu\alpha)^{1/n} = A(h\nu - E_g) \quad (\text{S1})$$

where:

$$h = \text{Planck's constant } (6.626 \cdot 10^{-34} \text{ kgm}^2\text{s}^{-1})$$

$$\nu = \text{Frequency of vibration}$$

$$\alpha = \text{Absorption coefficient}$$

$$A = \text{Proportional constant}$$

$$E_g = \text{Band gap energy}$$

The value of  $n$  depends on the nature of the transition for electrons moving from the valence band to the conduction band. It is equal to  $1/2$  and  $2$  for direct and indirect allowed transition, whereas it is  $3/2$  and  $3$  for direct and indirect forbidden transition, respectively.

The following calculation is an example using the results of the diffuse reflectance measurement for the  $\text{WO}_3$  nanoparticles. From the obtained diffuse reflectance spectrum, as shown in **Figure S4**, a function of reflectance ( $F(R)$ ) is calculated based on the following Kubelka-Munk equation <sup>6</sup>:

$$F(R) = \frac{(1-R)^2}{2R} \quad (\text{S2})$$

This  $F(R)$  constant can be substituted to **Equation (S1)** replacing the  $\alpha$  coefficient so that it can be written as:

$$(h\nu F(R))^{1/n} = A(h\nu - E_g) \quad (\text{S3})$$

For tungsten oxide, the nature of electron movement from the valence band to the conduction band is indirect allowed transition. Therefore, a value of  $2$  is used for the  $n$  constant. The value of  $h\nu$  is calculated based on the following equation:

$$h\nu = \frac{1239.7}{\lambda} \quad (\text{S4})$$

where  $\lambda$  is the irradiated light wavelength used in the diffuse reflectance measurement, as shown in **Figure S4**.

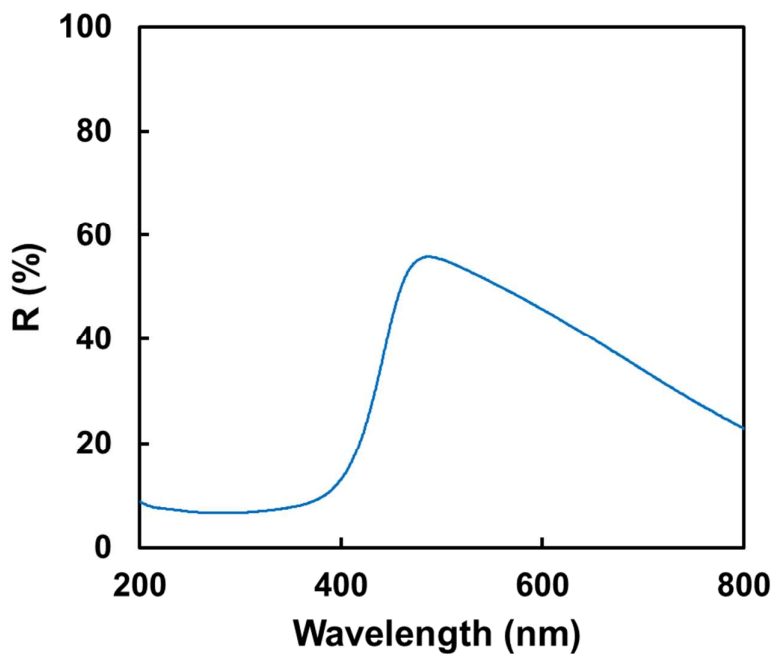

**Figure S4.** Diffuse reflectance spectrum for  $\text{WO}_3$  nanoparticles

Based on the **Equation (S2)**, **(S3)**, and **(S4)**, the value of  $(hvF(R))^{1/2}$  is plotted against  $hv$  the result is shown in **Figure S5**. From this Tauc plot, a tangent line is drawn at the inflection point of the curve, and the value of the band gap energy ( $E_g$ ) can be obtained from the intersection point between the x axis and the tangent line.

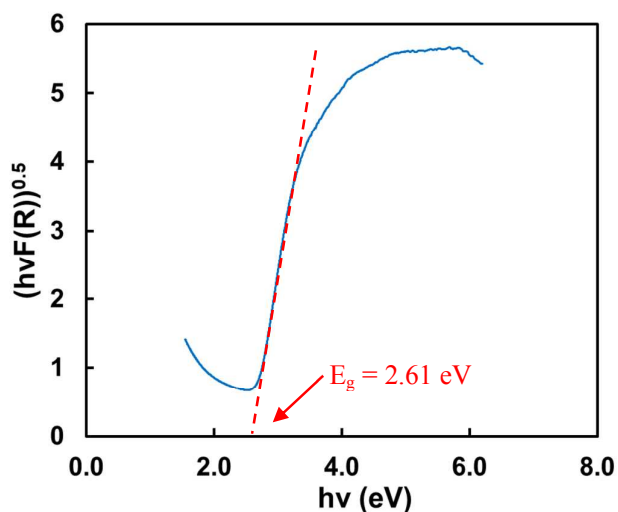

**Figure S5.** Tauc plot obtained for the  $\text{WO}_3$  nanoparticles using the Kubelka-Munk relation

The summary of diffuse reflectance spectra and Tauc plots for the  $\text{WO}_3$  and  $\text{WO}_x$  NPs is shown in **Figure S6**. When the  $\text{WO}_3$  NPs were reduced at 300 °C, the amount of oxygen vacancies was low. However, their absorption was increased across the entire measurement window compared with the  $\text{WO}_3$  NPs, as shown in **Figure S6(a)**. When the  $\text{WO}_3$  NPs were reduced at 400–500 °C, a significant improvement in the absorption of the  $\text{WO}_x$  NPs at long wavelengths was observed in **Figure S6(a)** and **S6(b)**. This indicated the dominance of absorption by the reduced W ions over  $\text{W}^{6+}$  within the NP structure. The free electrons within the NPs allowed them to absorb in the long wavelength region.

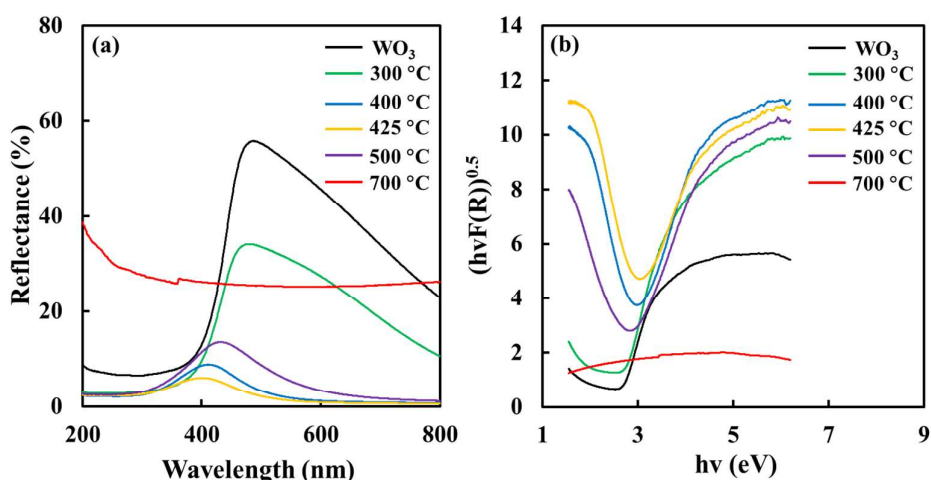

**Figure S6.** (a) Diffuse reflectance spectra and (b) Tauc plots for the  $\text{WO}_3$  NPs and  $\text{WO}_x$  NPs reduced at different temperatures.

From the calculated band gap values, valence and conduction band energies were estimated for  $\text{WO}_3$ <sup>7</sup>,  $\text{WO}_x$  (425 °C), and  $\text{WO}_x$  (500 °C) NPs, which can be seen in **Figure S7**. From **Figure S7**, it can be concluded that the electrons in the conduction bands of each sample are able to reduce  $\text{O}_2$  to  $\text{H}_2\text{O}_2$ , which then captures electrons to generate  $\text{OH}\bullet$ . Furthermore, the hole in the valence bands of each sample are able to oxidize  $\text{OH}^-$  and  $\text{H}_2\text{O}$  to  $\text{OH}\bullet$ . The generated hydroxyl radicals then degrade the RhB molecules following the advanced oxidation processes (AOPs). A proposed schematic illustration of RhB degradation mechanism over the  $\text{WO}_x$  NPs is shown in **Figure S8**.

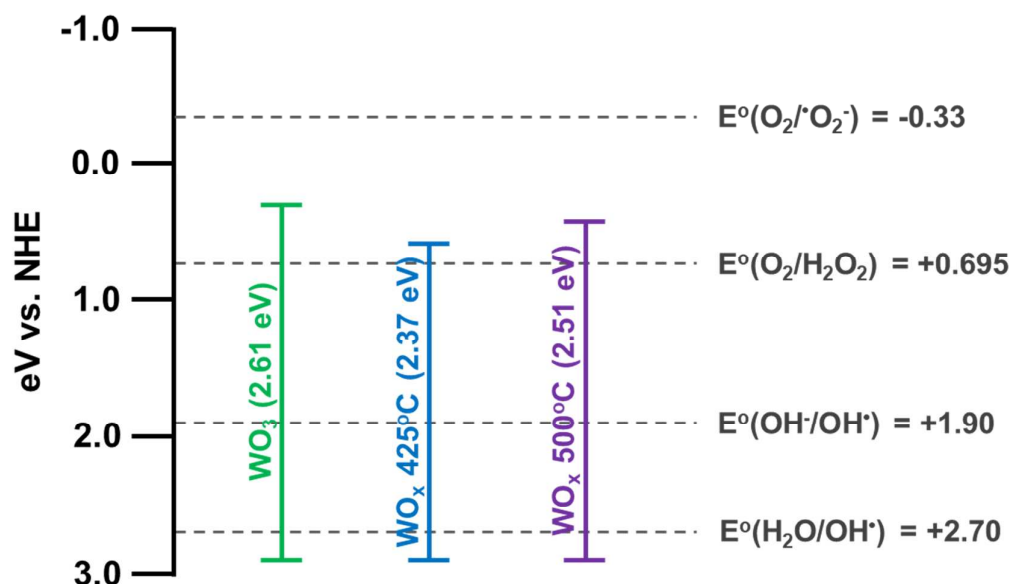

**Figure S7.** Band energies of  $\text{WO}_3$ ,  $\text{WO}_x$  (425 °C), and  $\text{WO}_x$  (500 °C). The values on the right side represent the redox potentials of several reactions that commonly contribute in degradation of rhodamine B.

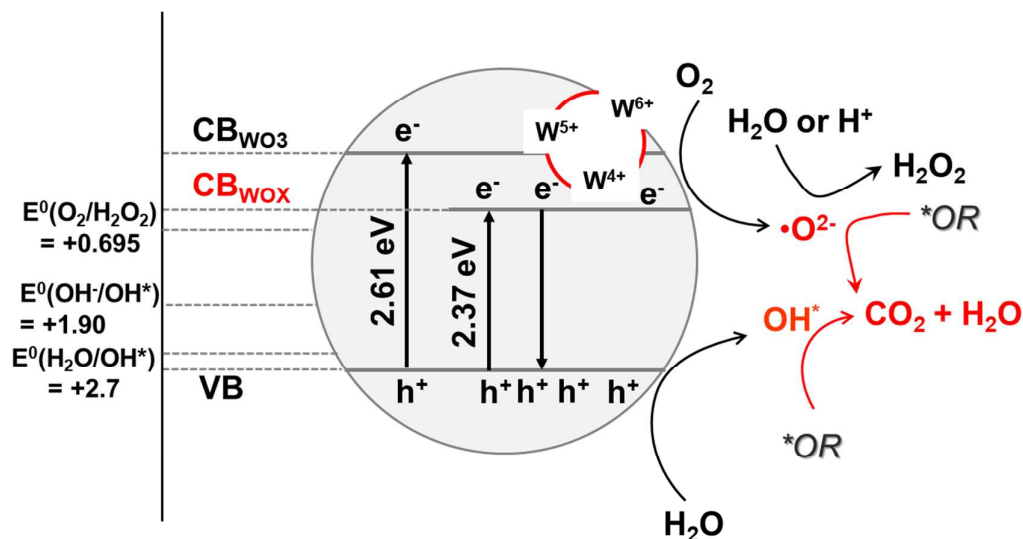

**Figure S8.** Proposed schematic illustration of RhB degradation mechanism on  $\text{WO}_x$  surface

## References

1. Tian, Y.; Cong, S.; Su, W.; Chen, H.; Li, Q.; Geng, F.; Zhao, Z., Synergy of  $\text{W}_{18}\text{O}_{49}$  and polyaniline for smart supercapacitor electrode integrated with energy level indicating functionality. *Nano letters* **2014**, *14* (4), 2150-2156.
2. Li, J.; Liu, Y.; Zhu, Z.; Zhang, G.; Zou, T.; Zou, Z.; Zhang, S.; Zeng, D.; Xie, C., A full-sunlight-driven photocatalyst with super long-persistent energy storage ability. *Sci Rep* **2013**, *3*, 2409.
3. Ji, R.; Zheng, D.; Zhou, C.; Cheng, J.; Yu, J.; Li, L., Low-temperature preparation of tungsten oxide anode buffer layer via ultrasonic spray pyrolysis method for large-area organic solar cells. *Materials (Basel)* **2017**, *10* (7).
4. Tauc, J.; Grigorovici, R.; Vancu, A., Optical properties and electronic structure of amorphous germanium. *physica status solidi (b)* **1966**, *15* (2), 627-637.
5. Davis, E.; Mott, N., Conduction in non-crystalline systems V. Conductivity, optical absorption and photoconductivity in amorphous semiconductors. *Philosophical Magazine* **1970**, *22* (179), 0903-0922.
6. Kubelka, V. P., Ein beintrag zur optik der farbanstriche. *Zeits. fur techn. Physik* **1931**, *12*, 593-601.
7. Highfield, J., Advances and recent trends in heterogeneous photo(electro)-catalysis for solar fuels and chemicals. *Molecules* **2015**, *20* (4), 6739-93.
